# Supplementary material
Source: publisher figshare collection journal article supplement (https://springernature.figshare.com/ndownloader/files/14195123)
Supplement: Supplementary file [file 14195123]

## **Additional file 6: Summary of study results (primary outcomes):**

### **Fractures of the hand:**

| ref  | Study              | Fracture site/type         | Country | Sensitivity (CI 95%)   | Specificity (CI 95%)   | NPV (CI 95%)           | PPV (CI 95%)           |
|------|--------------------|----------------------------|---------|------------------------|------------------------|------------------------|------------------------|
| (40) | Aksay (2016)       | Phalangeal                 | Turkey  | 79.3%<br>(59.7-91.2%)  | 90%<br>(81.4-95.0%)    | 93.1%<br>(85.0-97.1%)  | 71.8%<br>(53.0-85.6%)  |
| (39) | Aksay (2013)       | 5 <sup>th</sup> metacarpal | Turkey  | 97.4%<br>(84.9-99.9%)  | 92.9%<br>(79.4-98.1%)  | 97.5%<br>(85.3-99.9%)  | 92.6%<br>(79.0-98.1%)  |
| (43) | Tayal (2007)       | Metacarpal;<br>phalangeal  | USA     | 90%<br>(74-97%)        | 98%<br>(95-100%)       | 94%<br>(89-99%)        | 97%<br>(93-100%)       |
| (37) | Gungor (2016)      | Distal phalangeal          | Turkey  | 100%<br>(79-100%)      | 98.4%<br>(91-100%)     | -                      | -                      |
| (36) | Kocaoğlu (2016)    | Metacarpal                 | Turkey  | 92.5%<br>(78.5-98%)    | 98.28%<br>(89.5-99.9%) | 95%<br>(85-98%)        | 97.37%<br>(84.5-99.8%) |
| (42) | Javasdzadeh (2013) | Metacarpal                 | Iran    | 72.73%<br>(43.4-90.3%) | 77.78%<br>(45.3-93.7%) | 70%<br>(39.7-89.2%)    | 80%<br>(49.0-94.3%)    |
|      |                    | Phalangeal                 |         | 83.33%<br>(60.8-94.2%) | 90.48%<br>(77.9-96.2%) | 92.68%<br>(80.6-97.5%) | 78.95%<br>(56.7-94.5%) |

### **Fractures of the scaphoid:**

| ref  | Study          | Fracture site/type | Country     | Sensitivity (CI 95%) | Specificity (CI 95%) | NPV (CI 95%) | PPV (CI 95%) |
|------|----------------|--------------------|-------------|----------------------|----------------------|--------------|--------------|
| (27) | Platon (2010)  | Scaphoid           | Switzerland | 92%                  | 71%                  | 97%          | 46%          |
| (18) | Fusetti (2005) | Scaphoid           | Switzerland | 100%                 | 79%                  | 100%         | 56%          |
| (30) | Herneth (2001) | Scaphoid           | Austria     | 78%                  | 100%                 | 75%          | 100%         |

### **Fractures of the foot and ankle:**

| ref  | Study            | Fracture site/type         | Country | Sensitivity (CI 95%)  | Specificity (CI 95%)  | NPV (CI 95%)        | PPV (CI 95%)        |
|------|------------------|----------------------------|---------|-----------------------|-----------------------|---------------------|---------------------|
| (45) | Tollefson (2016) | Foot; ankle                | USA     | 100%<br>(78-100%)     | 100%<br>(87-100%)     | 100%<br>(89-100%)   | 100%<br>(81-100%)   |
| (38) | Atilla (2014)    | Foot; ankle                | Turkey  | 87.3%<br>(77.5-93.4%) | 86.4%<br>(93.1-98.2%) | -                   | -                   |
| (35) | Yesilaras (2013) | 5 <sup>th</sup> metatarsal | Turkey  | 97.1%<br>(82.9-99.8%) | 100%<br>(91.1-100%)   | -                   | -                   |
| (19) | Ekinci (2013)    | Foot; ankle                | Turkey  | 100%<br>(83.8-100%)   | 99.1%<br>(95-99.8%)   | 100%<br>(96.4-100%) | 95.2%<br>(89.6-98%) |
| (29) | Banal (2009)     | Metatarsal stress          | France  | 83.3%                 | 75.9%                 | 91.7%               | 58.8%               |
| (44) | Hedelin (2013)   | Ankle                      | Sweden  | 100%                  | 85.9%                 | 100%                | 62.2%               |

### **Fractures of the upper limb:**

| ref  | Study               | Fracture site/type | Country       | Sensitivity (CI 95%)   | Specificity (CI 95%)   | NPV (CI 95%)           | PPV (CI 95%)           |
|------|---------------------|--------------------|---------------|------------------------|------------------------|------------------------|------------------------|
| (41) | Bolandparvaz (2013) | Upper limb         | Iran          | 55.5%<br>(22.6-84.6%)  | 84%<br>(53.6-97.2%)    | 73%<br>(44.8-91.0%)    | 71%<br>(30.2-94.8%)    |
| (32) | Marshburn (2004)    | Humeral; femoral   | USA           | 93%<br>(77-99%)        | 83%<br>(74-98%)        | -                      | -                      |
| (33) | Sivrikaya (2016)    | Radial             | Turkey        | 100%<br>(92.4-100%)    | 88.2%<br>(71.6-96.1%)  | -                      | -                      |
|      |                     | Ulnar              |               | 89.5%<br>(65.5-98.1%)  | 94.6%<br>(86-98.2%)    | -                      | -                      |
| (42) | Javadzadeh (2014)   | Wrist              | Iran          | 42.11%<br>(23.1-63.7%) | 86.96%<br>(74.3-98.9%) | 78.43%<br>(65.4-87.5%) | 57.14%<br>(32.6-78.6%) |
|      |                     | Distal forearm     |               | 89.06%<br>(79.1-94.6%) | 94.41%<br>(81.5-95.3%) | 90.41%<br>(81.5-95.3%) | 93.44%<br>(84.3-97.4%) |
| (48) | Dulchavsky (2002)   | Forearm; arm       | USA           | 92%                    | 100%                   | -                      | -                      |
| (34) | Dallaudière (2015)  | Upper limb         | South America | 96.9%                  | 100%                   | 93.3%                  | 100%                   |
| (47) | Lau (2016)          | Distal radial      | USA           | 100%                   | 90-95%                 | -                      | -                      |

### **Fractures of the lower limb:**

| ref  | Study               | Fracture site/type    | Country       | Sensitivity (CI 95%) | Specificity (CI 95%)  | NPV (CI 95%)          | PPV (CI 95%)          |
|------|---------------------|-----------------------|---------------|----------------------|-----------------------|-----------------------|-----------------------|
| (41) | Bolandparvaz (2013) | Lower limb            | Iran          | 75%<br>(35.5-95.5%)  | 72%<br>(39.3-92.6%)   | 80%<br>(44.2-96.4%)   | 66%<br>(30.9-90%)     |
| (31) | Safran (2009)       | Hip                   | Israel        | 100%                 | 65%                   | 100%                  | 59%                   |
| (32) | Marshburn (2004)    | Humeral; femoral      | USA           | 93%<br>(77-99%)      | 83%<br>(74-98%)       | -                     | -                     |
| (26) | Kilic (2016)        | Patella               | Turkey        | 93.3%<br>(66-99.7%)  | 94.8%<br>(86.5-98.3%) | 98.5%<br>(91.7-99.9%) | 77.8%<br>(51.9-92.6%) |
| (48) | Dulchavsky (2002)   | Femoral; tibia/fibula | USA           | 83%                  | 100%                  | -                     | -                     |
| (34) | Dallaudière (2015)  | Lower limb            | South America | 100%                 | 80%                   | 100%                  | 93.8%                 |

### **Other fracture sites:**

| ref  | Study             | Fracture site/type           | Country | Sensitivity (CI 95%) | Specificity (CI 95%) |
|------|-------------------|------------------------------|---------|----------------------|----------------------|
| (28) | Weinberg (2010)   | Not specified                | USA     | 60% (39-78%)         | 92% (87-96%)         |
| (46) | Čičak (1998)      | Hill-Sachs lesion (shoulder) | Croatia | 96%                  | 100%                 |
| (25) | Farin (1996)      | Hill-Sachs lesion (shoulder) | Finland | 91%                  | 95%                  |
| (48) | Dulchavsky (2002) | Hand/foot                    | USA     | 50%                  | 100%                 |
